# Supplementary material for: Ex vivo visualization of RNA polymerase III-specific gene activity with electron microscopy
Source: Springer Nature journal article supplement (doi:10.1038/s42003-021-01752-8), 2021-02-19
Supplement: MOESM2 [file 42003_2021_1752_MOESM2_ESM.pdf]

## SUPPLEMENTARY INFORMATION

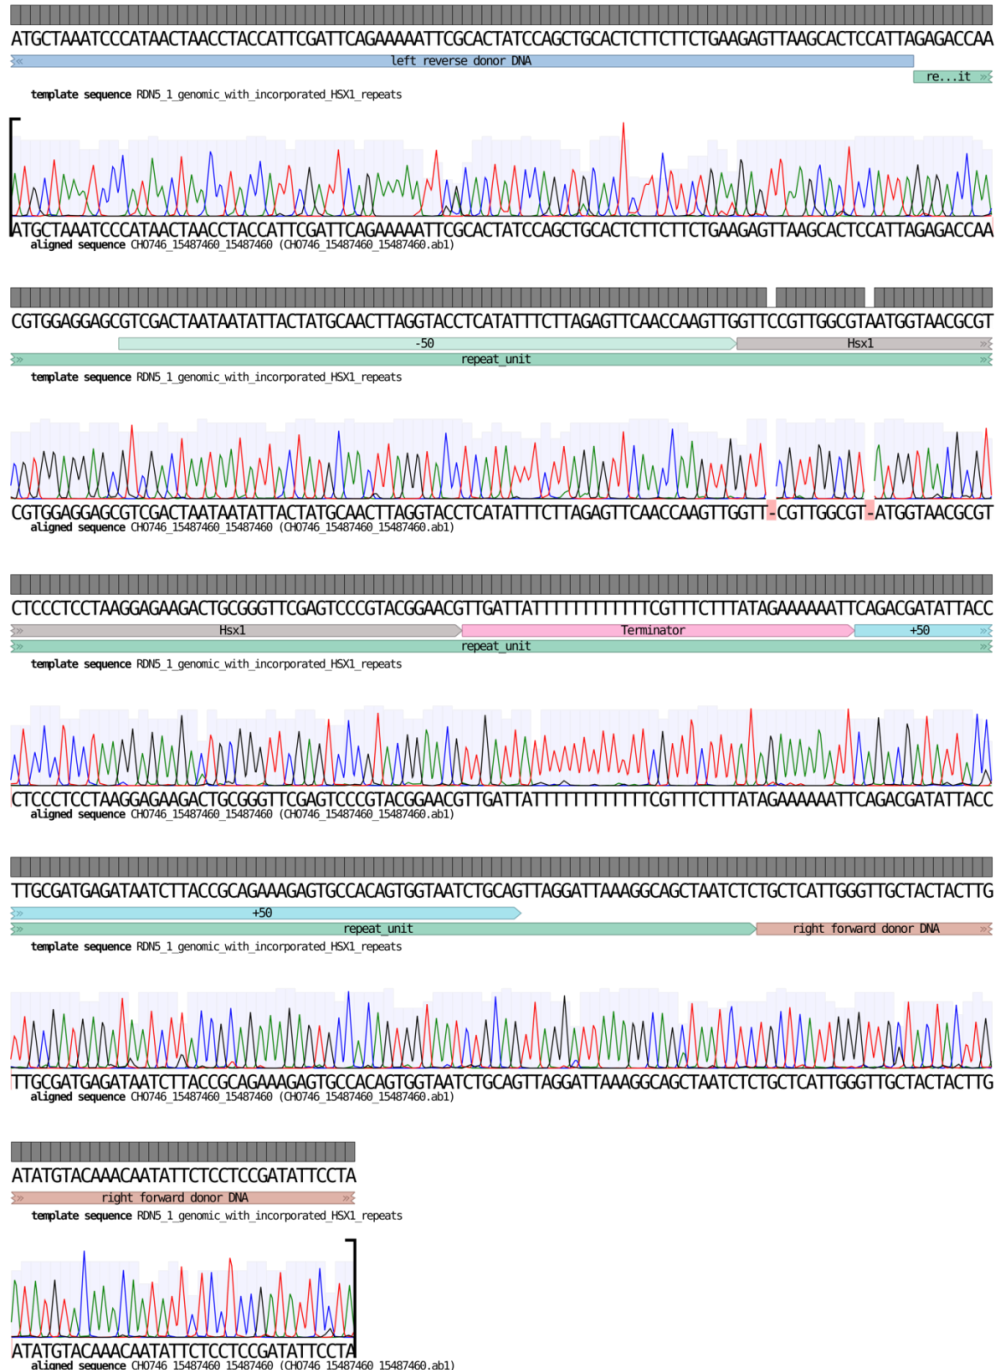

**Supplementary Figure 1a: Sanger sequencing results of 5x(O)RDN5.** The sequence confirms the identity of the *RDN5* copy. It covers the downstream junction between the incorporated copy and the genomic DNA (right forward donor DNA). On the upstream side, parts of another incorporated *RDN5* copy are covered, indicating the incorporation of at least two copies at this genomic site.

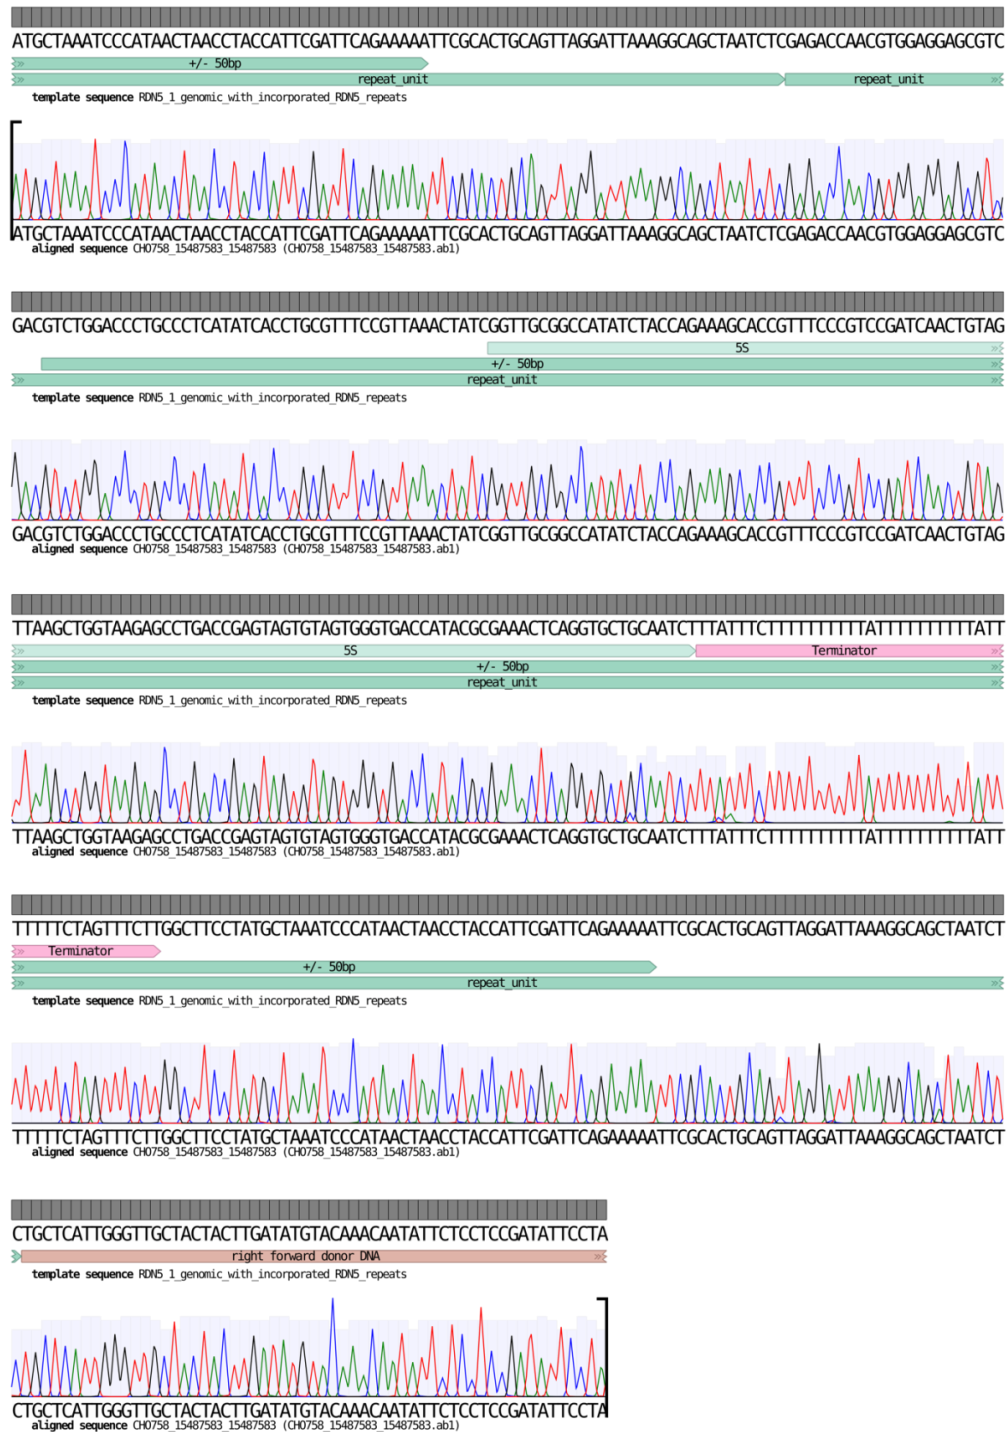

**Supplementary Figure 1b: Sanger sequencing results of 2.5x(J)HSX1.** The sequence confirms the identity of the *HSX1* copy. It covers both the upstream and the downstream junctions between the incorporated copy and the genomic DNA (left reverse donor DNA and right forward donor DNA). At this genomic site, only one copy was incorporated.

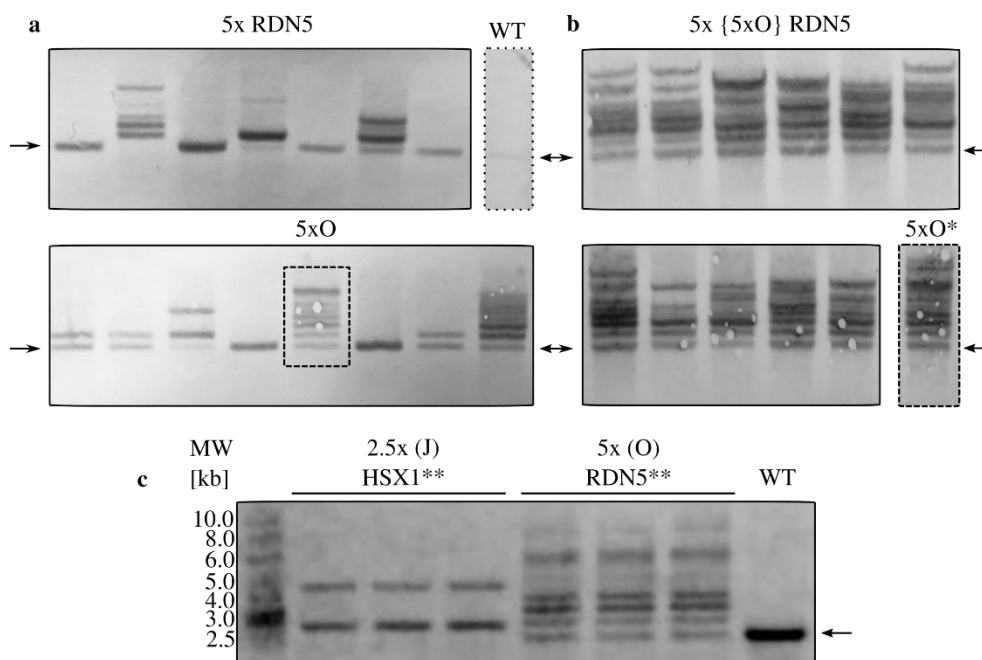

**Supplementary Figure 2: Southern blot (SB) analysis of isolated genomic DNA.** Dashed arrows mark the bands of the endogenous *RDN5* gene copies and the empty incorporation sites (the endogenous copies are themselves part of the rDNA repeats). **(a) Exemplary SB analysis of clones created in IMX672 (WT, see dotted box) background using editing condition 5x(*RDN5*)** (see Supplementary Table 4). The clone inside the dashed box (5x(O)*RDN5*) was used for further experiments. **(b) SB analysis of iteratively edited and propagated clones.** Clones were created in 5x(O)*RDN5* background using editing condition 5x (see Supplementary Table 4). The clone inside the dashed box (5x(O)*RDN5*) was re-analyzed after three rounds of re-plating (\*). **(c) SB analysis of the long-term stability of the clones 2.5x(J)*HSX1* and 5x(O)*RDN5*.** Both clones were re-analyzed after > ten rounds of re-plating over the course of > six month (\*\*) in triplicates from individual plates. We used KPL GeneRuler™ Biotinylatd DNA Ladder. The band pattern of 2.5x(J)*HSX1* perfectly matches that on the SB in Figure 2 (clone from original plate). The band pattern of 5x(O)*RDN5* matches that in Supplementary Figure 2b (after three rounds of re-plating) and Figure 2 (after ~ five rounds of re-plating). In comparison to the band pattern in Supplementary Figure 2a (clone from original plate), additional, higher-migrating bands are visible at the top of the pattern. These could derive from a lower DNA digestion or DNA transfer efficiency of the earliest SB or an early recombination event during strain propagation. As no further changes in band pattern occurred between more often re-plated strains in later SB analyses, we consider the first explanation to be more likely. Later SB analyses (Supplementary Figure 2c and Figure 2) have been performed with digestion and transfer times of > 16h to promote appearance of higher-migrating bands.

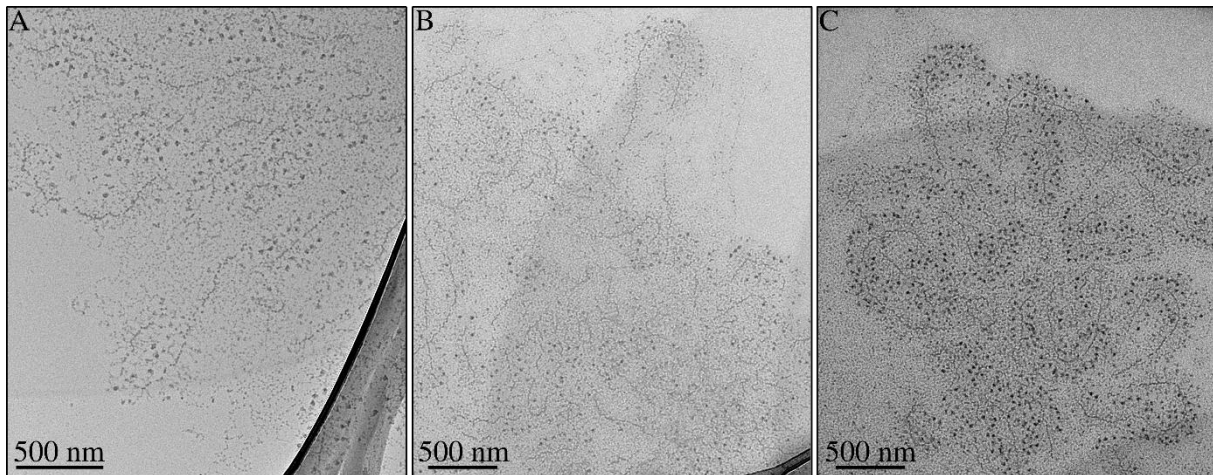

**Supplementary Figure 3: Overview of Miller trees in chromatin spreads of (a) IMX672 (WT), (b) 2.5x(J)HSX1 and (c) 5x(O)RDN5.** The rDNA repeat seems unchanged in overall appearance and numbers of Miller trees. The samples were positively stained with UA and PTA; EM images were acquired at 12,000x magnification at a defocus of  $-40\ \mu\text{m}$ .

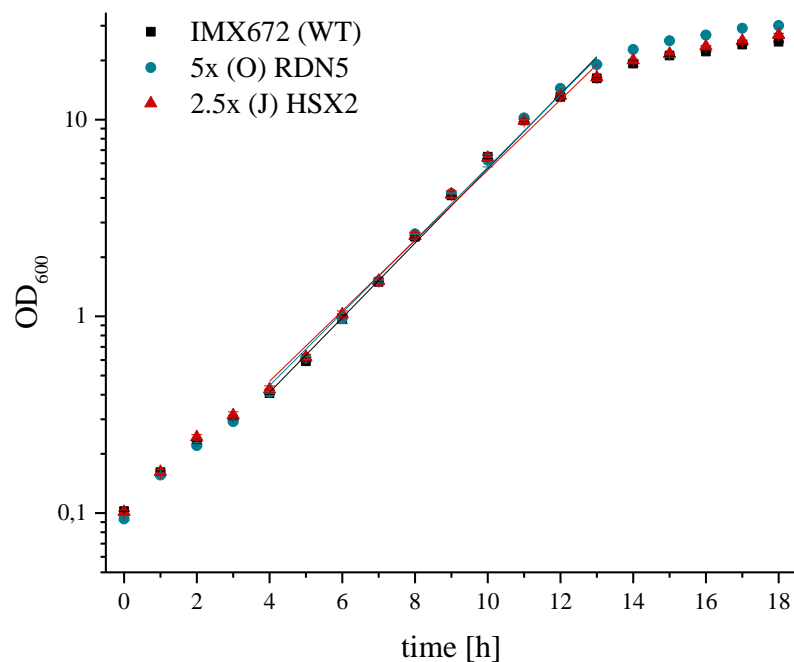

**Supplementary Figure 4: Growth of IMX672 (WT), 5x(O)RDN5 and 2.5x(J)HSX1.** The OD<sub>600</sub> of the strains were measured every hour over the course of 18 hours for three distinct replicates per strain. The curves were analyzed by logarithmic transformation and linear fit from  $t = 3$  to  $t = 13$  (exponential growth phase) with line slopes being  $0.189 \pm 0.006$  ( $R^2 = 0.992$ ) for IMX672 (WT),  $0.185 \pm 0.004$  ( $R^2 = 0.996$ ) for 5x(O)RDN5 and  $0.179 \pm 0.006$  ( $R^2 = 0.994$ ) for 2.5x(J)HSX1. Error bars represent standard deviations.

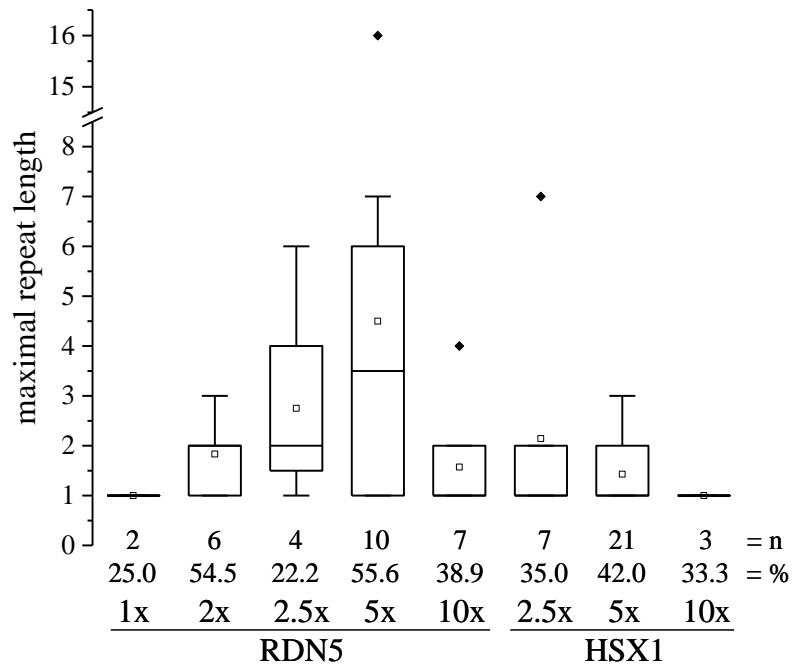

**Supplementary Figure 5: Boxplot analysis of maximal incorporated copy numbers for all experimental conditions.** Box = 25–75%, bracket = range within 1.5 IQR, horizontal line = median, square = mean, diamonds = outliers. Boxplots include only clones with a positive incorporation result. The number of positive clones and their percentage in relation to all analyzed clones are indicated below the boxes. Sample-sizes were based on the maximal number of samples that could be analyzed in parallel by Southern blotting. No data was excluded, all analyzed clones were included in the box plot.

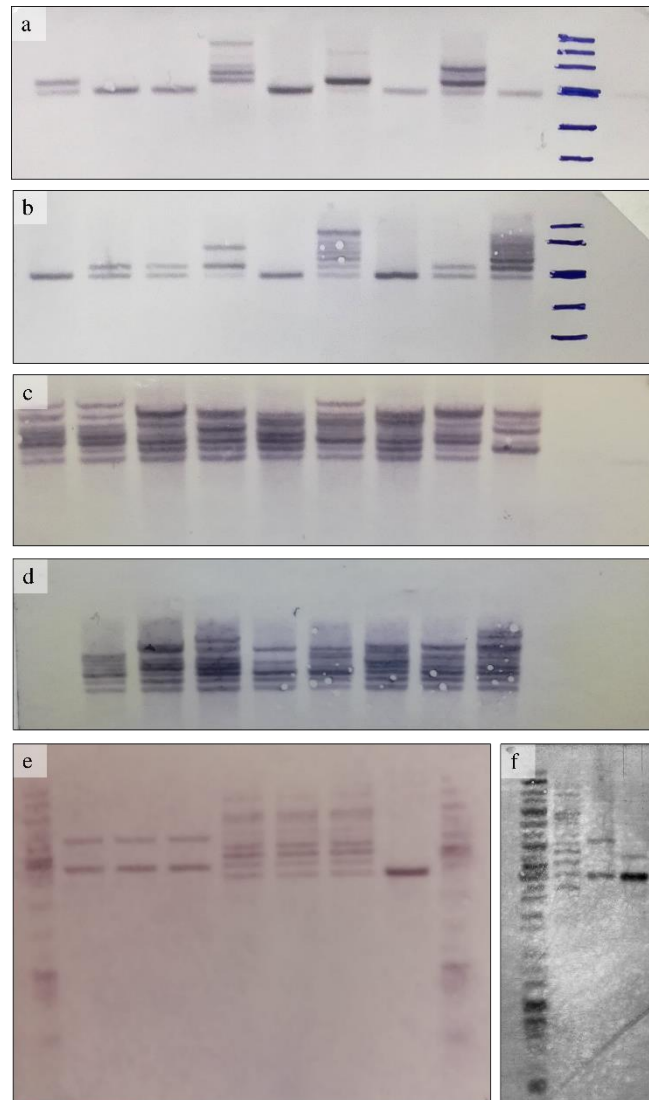

**Supplementary Figure 6: Raw and uncropped Southern blot membranes. (a - b) Supplementary Figure 2a (c - d) Supplementary Figure 2b (e) Supplementary Figure 2c (f) Figure 2a**

**Supplementary Table 1: Sequences of the oligonucleotides used to assemble the repeat unit.**

|                  | Sequence 5' to 3'                                     |
|------------------|-------------------------------------------------------|
| Oligo I (fw)     | GAGACCAACGTGGAGGAGCGTCGACGTCTGGACCCTGCCCTCATATCACC    |
| RDN5             | TG                                                    |
| Oligo II (rev)   | CCCTGCCCTCATATCACCTGCGTTTCCGTTAAACTATCGGTTGCGGCCATAT  |
| RDN5             |                                                       |
| Oligo III (fw)   | ACTATCGGTTGCGGCCATATCTACCAGAAAGCACCGTTTCCCGTCCGATCA   |
| RDN5             | A                                                     |
| Oligo IV (rev)   | ACCGTTTCCCGTCCGATCAACTGTAGTTAAGCTGGTAAGAGCCTGACCGA    |
| RDN5             | GT                                                    |
| Oligo V (fw)     | TGGTAAGAGCCTGACCGAGTAGTGTAGTGGGTGACCATACGCGAAACTCA    |
| RDN5             | GG                                                    |
| Oligo VI (rev)   | GACCATACGCGAAACTCAGGTGCTGCAATCTTATTTCTTTTTTTTTTATTT   |
| RDN5             |                                                       |
| Oligo VII (fw)   | TATTTCTTTTTTTTTTATTTTTTTTTTATTTTTTTCTAGTTTCTTGGCTTCC  |
| RDN5             |                                                       |
| Oligo VIII (rev) | TTTCTAGTTTCTTGGCTTCTATGCTAAATCCATAACTAACCTACCATTCTG   |
| RDN5             | ATTCAGAA                                              |
| Oligo IX (fw)    | CATAACTAACCTACCATTCTGATTCAGAAAAATTTCGCACTGCAGTTAGGATT |
| RDN5             | A                                                     |
| Oligo X (rev)    | CGCTCCTCCACGTTGGTCTCGAGATTAGCTGCCTTAACTCTAACTGCAGT    |
| RDN5             | GCGA                                                  |
| Oligo I (fw)     | GAGACCAACGTGGAGGAGCGTCGACTAATAATATTACTATGCAACTTAGG    |
| HSX1             |                                                       |
| Oligo II (rev)   | CCAAGTTGGTTGAACTCTAAGAAATATGAGGTACCTAAGTTGCATAGTAAT   |
| HSX1             | A                                                     |
| Oligo III (fw)   | TAGAGTTCAACCAAGTTGGTCCGTTGGCGTAATGGTAACGCGTCTCCCTC    |
| HSX1             | C                                                     |
| Oligo IV (rev)   | CGTACGGGACTCGAACC CGCAGTCTTCTCCTTAGGAGGGAGACGCGTTAC   |
| HSX1             | CA                                                    |
| Oligo V (fw)     | CGGGTTCGAGTCCCGTACGGAACGTTGATTATTTTTTTTTTTTCGTTTCTTT  |
| HSX1             | ATA                                                   |
| Oligo VI (rev)   | GATTATCTCATCGCAAGGTAATATCGTCTGAATTTTTTCTATAAAGAAACGA  |
| HSX1             | AAAAAA                                                |
| Oligo VII (fw)   | ACCTTGCGATGAGATAATCTTACCGCAGAAAGAGTGCCACAGTGGTAATC    |
| HSX1             | TGCAGTTA                                              |
| Oligo VIII (rev) | GCTCCTCCACGTTGGTCTCGAGATTAGCTGCCTTAACTCTAACTGCAGATT   |
| HSX1             | ACCACTG                                               |

**Supplementary Table 2: Sequences of the donor DNA pieces.**

|                        | Sequence 5' to 3'                                                                                                                                                                                      |
|------------------------|--------------------------------------------------------------------------------------------------------------------------------------------------------------------------------------------------------|
| Left reverse donor DNA | <b>TCCAGACGTCGACGCTCCTCCACGTTGGTCTCTAATGGAGTGCTTAAC</b>                                                                                                                                                |
| RDN5                   | TCTTCAGAAGAAGAGTGCAGCTGGATAGTGCGAATTTTTCTGAATCGAAT<br>GGTAGGTTAGTTATGGGATTTAGCATAGGAAGCCAAGAACTAGAAAAAA<br>AAAAAAAAAAAAAAAAAAAAAAAAAAGAAATAAAGATTGCAGCACCTGAGT<br>TTCGCGTATGGTCAACCACTACACTACTCGGTCAGG |
|                        | <b>Reverse begin of repeat + reverse 200 bp genomic DNA</b>                                                                                                                                            |

Right forward donor **CTACCATTCGATTCAGAAAAATTCGCACTGCAGTTAGGATTAAGGCA**  
 DNA **GCTAATCTCTGCTCATTGGGTTGCTACTACTTGATATGTACAAACAATATTC**  
 RDN5 **TCCTCCGATATTCCTACAAAAAAAAAAAAAAAAAACTCCGGTTTTGTTC**  
**TCTTCCCTCCATTCCTCTCTTCTACGGTTAATACTTTCCTCTTCGTCTTT**  
**TCTACACCCTCGTTTAGTTGCTTCTTATTCTTCCCGCTTTCCTGCACTAAC**  
**AT**  
**Forward end of repeat + forward 200 bp genomic DNA**

Long left reverse donor **TCCAGACGTCGACGCTCCTCCACGTTGGTCTCTAATGGAGTGCTTAAC**  
 DNA **TCTTCAGAAGAAGAGTGCAGCTGGATAGTGCGAATTTTTCTGAATCGAAT**  
 RDN5 **GGTAGGTTAGTTATGGGATTTAGCATAGGAAGCCAAGAACTAGAAAAAA**  
**AAAAAAAAAAAAAAAAAAAAAAAAAAGAAATAAAGATTGCAGCACCTGAGT**  
**TTCGCGTATGGTCACCCACTACACTACTCGGTCAGGCTCTTACCAGCTTAA**  
**CTACAGTTGATCGGACGGGAAACGGTGCTTTCTGGTAGATATGGCCGCAA**  
**CCGATAGTTTAAACGGAAACGCAGGTGATATGAGGGCAGGGTCCAGACATG**  
**TTCAGTAGGTGGGAGTGAGAGGTGTTATGGGTGGAGGACAATTTTTATTAT**  
**ATTTTCATCTAATAGCAATAGGATATGACAGGTGAAAAAGCAAAAGCAATAG**  
**TGCATTGTGATGTGGAGAATAAGGTGCATACGATGAAAAAGGTGATTTGTC**  
**ATTTACAAGAGGTAGGTTCGAAACAGAACATGAAAGTTGGTCGGTAGGTGG**  
**CATGCAGAGGTAGTTTCAAGGTGACAGGTTATGAAGATATGGTGCAAAAG**  
**ACAAATGGATGGTGGCAGGCATAGTAAAATGATGGTGTGGAAGACATAGA**  
**TGGTATTTGTTTTGCATTTACGGCACCGGATGCGGGCGATAATGACGGGAA**  
**GAGATTTAGTATGTGGGACAGAATGTCGGCGGCAGTATTGAGACCATGAG**  
**AGTAGCAAACGTAAGTCTAAAGGTTGTTTTATAGTAGTTAGGATGTAGAAA**  
**ATGTATTCCGATAGGCCATTTTACATTTGGAGGGACGG**  
**Reverse begin of repeat + reverse 808 bp genomic DNA**

Long right forward **CTACCATTCGATTCAGAAAAATTCGCACTGCAGTTAGGATTAAGGCA**  
 donor DNA **GCTAATCTCTGCTCATTGGGTTGCTACTACTTGATATGTACAAACAATATTC**  
 RDN5 **TCCTCCGATATTCCTACAAAAAAAAAAAAAAAAAACTCCGGTTTTGTTC**  
**TCTTCCCTCCATTCCTCTCTTCTACGGTTAATACTTTCCTCTTCGTCTTT**  
**TCTACACCCTCGTTTAGTTGCTTCTTATTCTTCCCGCTTTCCTGCACTAAC**  
**ATTTTGCCGCATTACACTATATGATCGTAGTACATCTTACAACCTCCGCATAC**  
**CGCGTCGCCGCGTCGCCGCGTCGCCAAAATTTACTTCGCCAACCATTTCCA**  
**TATCTGTTAAGTATACATGTATATATTGCACTGGCTATTCATCTTGCACTTTT**  
**CCTCTTTCTTCTTCCCAGTAGCCTCATCCTTTTACGCTGCCTCTCTGGAAC**  
**TGCCATCATCATTCCCTAGAACTGCCATTTACTTAAAAAAAAAAAAAAAAAA**  
**AAAAAATGTCCCCACTGTTCACTGTTCACTGTTCACTTGTCTCTTACATC**  
**TTTCTTGGTAAAATCGTAGTTCGTAGTATTTTTTTTCATATCAAAGGCATGT**  
**CCTGTTAACTATAGGAAATGAGCTTTTCTCAATTCTCTAACTTATACAAGC**  
**ACTCATGTTTGCCGCTCTGATGGTGCGGAAAAAACTGCTCCATGAAGCAA**  
**ACTGTCCGGGCAAATCCTTTCACGCTCGGGAAGCTTTGTGAAAGCCCTTC**  
**TCTTTC AACCCATCTTTGCAACGAAAAAAAAAAAAAAAAATAAAAAATAAA**  
**AAGACCAAATAGTAAATAGTAACTTACATACATTAGTAAATGGTACTCTT**  
**ACACACTATCATCCTCATCG**  
**Forward end of repeat + forward 833 bp genomic DNA**

Long left reverse donor **GCATAGTAATATTATTAGTCGACGCTCCTCCACGTTGGTCTCTAATGGA**  
 DNA **GTGCTTAACTCTTCAGAAGAAGAGTGCAGCTGGATAGTGCGAATTTTTCT**  
 HSX1 **GAATCGAATGGTAGGTTAGTTATGGGATTTAGCATAGGAAGCCAAGAACT**  
**AGAAAAAAAAAAAAAAAAAAAAAAAAAAAAAAAAAAGAAATAAAGATTGCAGC**  
**ACCTGAGTTTCGCGTATGGTCACCCACTACACTACTCGGTCAGGCTCTTAC**  
**CAGCTTAACTACAGTTGATCGGACGGGAAACGGTGCTTTCTGGTAGATATG**  
**GCCGCAACCGATAGTTTAAACGGAAACGCAGGTGATATGAGGGCAGGGTCC**  
**AGACATGTTCAAGTAGGTGGGAGTGAGAGGTGTTATGGGTGGAGGACAATT**  
**TTTATTATATTTTCATCTAATAGCAATAGGATATGACAGGTGAAAAAGCAAAA**



GCAATAGTGCATTGTGATGTGGAGAATAAGGTGCATACGATGAAAAAGGT  
 GATTTGTCATTTACAAGAGGTAGGTCGAAACAGAACATGAAAGTTGGTGC  
 GTAGGTGGCATGCAGAGGTAGTTTCAAGGTGACAGGTTATGAAGATATGG  
 TGCAAAAAGACAAATGGATGGTGGCAGGCATAGTAAAATGATGGTGTGGAA  
 GACATAGATGGTATTTGTTTTGCATTTACGGCACCGGATGCGGGCGATAAT  
 GACGGGAAGAGATTTAGTATGTGGGACAGAATGTCGGCGGCAGTATTGAG  
 ACCATGAGAGTAGCAAACGTAAGTCTAAAGGTTGTTTTATAGTAGTTAGGA  
 TGTAGAAAATGTATTCCGATAGGCCATTTTACATTTGGAGGGACGG

**Reverse begin of repeat** + reverse 808 bp genomic DNA

Long right forward **CAGTGGTAATCTGCAGTTAGGATTAAGGCAGCTAATCTCTGCTCATTG**  
 donor DNA **GGTTGCTACTACTTGATATGTACAAACAATATTCTCCTCCGATATTCTTACA**  
 HSX1 **AAAAAAAAAAAAAAAAAACTCCGGTTTTGTTCTCTTCCCTCCATTTCCCT**  
**CTCTTCTACGGTTAATACTTTCTCTTCGTCTTTTTCTACACCCTCGTTTAGT**  
**TGCTTCTTATTCTTCCCGCTTTCTGCACTAACATTTTGCCGCATTACACTA**  
**TATGATCGTAGTACATCTTACAACCTCCGCATACCGCGTCGCCGCGTCGCCG**  
**CGTCGCCAAAAATTTACTTCGCCAACCATTCCATATCTGTAAAGTATACATG**  
**TATATATTGCACTGGCTATTCATCTTGCACTTTTCTCTTCTTCCCAGT**  
**AGCCTCATCCTTTTACGCTGCCTCTCTGGAACCTGCCATCATCATTCCCTAG**  
**AAACTGCCATTTACTTAAAAAAAAAAAAAAAAAAAAAAAAATGTCCCCACTGT**  
**TCACTGTTCACTGTTCACTTGTCTCTTACATCTTTCTTGGTAAAATCGTAGT**  
**TCGTAGTATTTTTTTTCATATCAAAGGCATGTCTGTAACTATAGGAAATG**  
**AGCTTTTCTCAATTCTCTAAACTTATAACAAGCACTCATGTTTGCCGCTCTGA**  
**TGGTGCGGAAAAACTGCTCCATGAAGCAAAGTCCGGGCAAATCCTTT**  
**CACGCTCGGGAAGCTTTGTGAAAGCCCTTCTTTTCAACCCATCTTTGCAA**  
**CGAAAAAAAAAAAAAAAAAATAAAAAATAAAAAGACCAAATAGTAAATAGT**  
**AACTTACATACATTAGTAAATGGTACACTCTTACACACTATCATCCTCATCG**

**Forward end of repeat** + forward 833 bp genomic DNA

**Supplementary Table 3: Sequences of all primers used.**

| Abbreviation | Function                             | Sequence                                                                                  |
|--------------|--------------------------------------|-------------------------------------------------------------------------------------------|
| p_1.1_fw     | pMEL10 linearization                 | GTTTTAGAGCTAGAAATAGCAAGTTAAAATAAGGCTAG<br>TC                                              |
| p_1.2_rev    | pMEL10 linearization                 | GATCATTATCTTTCCTACTGCGGAGAAG                                                              |
| p_2.1_fw     | left 70 bp gRNA cassette             | TGCGCATGTTTCGGCGTTCGAAACTTCTCCGCAGTGAA<br>AGATAAATGATCTAGCAACCAATGAGCATAA                 |
| p_2.2_rev    | right 70 bp gRNA cassette            | GTTGATAACGGACTAGCCTTATTTAACTTGCTATTTCTA<br>GCTCTAAAACCTTATGCTCATTGGGTTGCTA                |
| p_3.1_fw     | left reverse<br>donor RDN5           | TCCAGACGTCGACGCTCCTCCACGTTGGTCTCTAATGG<br>AGTGCTTAACTCTTCAGAAGAAG                         |
| p_3.2_rev    | left reverse<br>donor RDN5           | CCTGACCGAGTAGTGTAGTGGGTG                                                                  |
| p_3.3_fw     | right forward<br>donor RDN5          | CTACCATTGATTTCAGAAAAATTCGCACTGCAGTTAGGA<br>TTAAAGGCAGCTAATCTCTGCTCATTGGGTTGCTACTAC<br>TTG |
| p_3.4_rev    | right forward<br>donor RDN5          | ATGTTAGTGCAGGAAAGCGGGAAG                                                                  |
| p_3.5_fw     | long left reverse<br>donor RDN5      | TCCAGACGTCGACGCTCCTCCACGTTGGTCTCTAATGG<br>AGTGCTTAACTCTTCAGAAGAAG                         |
| p_3.6_rev    | long left reverse<br>donor RDN5/HSX1 | CCGTCCCTCCAAATGTAATGGCCTATCGG                                                             |

|           |                                     |                                                                                      |
|-----------|-------------------------------------|--------------------------------------------------------------------------------------|
| p_3.7_fw  | long right forward donor RDN5       | CTACCATTTCGATTCAGAAAAATTCGCACTGCAGTTAGGATTAAAGGCAGCTAATCTCTGCTCATTGGGTTGCTACTACTTGTG |
| p_3.8_rev | long right forward donor RDN5/HSX1  | CGATGAGGATGATAGTGTGTAAGAGTGTACC                                                      |
| p_3.9_fw  | long left reverse donor HSX1        | GCATAGTAATATTATTAGTTCGACGCTCCTCCACGTTGGTCTCTAATGGAGTGCTTAACTCTTCAGAAGAAG             |
| p_3.10_fw | long right forward donor HSX1       | CAGTGGTAATCTGCAGTTAGGATTAAAGGCAGCTAATCTCTGCTCATTGGGTTGCTACTACTTG                     |
| p_5.1_fw  | Pol3 RDN5/HSX1 repeat unit          | GAGACCAACGTGGAGGAGC                                                                  |
| p_5.2_rev | Pol3 RDN5/HSX1 repeat unit          | GAGATTAGCTGCCTTTAATCCTAA                                                             |
| p_6.1_fw  | p414-TEF1p-Cas9-CYC1t linearization | TCTCAGCTCGGTGGAGACAGCAG                                                              |
| p_6.2_rev | p414-TEF1p-Cas9-CYC1t linearization | TTTCCCGGGGGATCCACTAGTTCTAG                                                           |
| p_6.3_fw  | PZF1 insert generation              | CTAATCTAAGTTTTCTAGAACTAGTGGATCCCCCGGGAA AAGTAACTGTTGAAATCGCTGTC                      |
| p_6.4_rev | PZF1 insert generation              | GCGTGACATAACTAATTACATGACTCGAGGTCGACACC AATTGCAGTAACAAAATGGC                          |

**Supplementary Table 4: Amounts of components used to transform IMX672 for CRISPR/Cas9 incorporation experiments.**

|                                | RDN5 |     |      |      |      | HSX1 |      |      |
|--------------------------------|------|-----|------|------|------|------|------|------|
|                                | 1x   | 2x  | 2.5x | 5x   | 10x  | 2.5x | 5x   | 10x  |
| pMEL10_gRNA [µg]               | 1    | 2   | 1    | 5    | 5    | 1    | 2.5  | 2.5  |
| Right_fw donor DNA [pmol]      | 5    | 10  | 5    | 14.5 | 16.2 | 6.3  | 11.5 | 9.8  |
| Left_rev donor DNA [pmol]      | 5    | 10  | 5    | 14.5 | 16.2 | 6.3  | 11.5 | 9.8  |
| Long right_fw donor DNA [pmol] | -    | -   | -    | 3.2  | 5.8  | 3.9  | 5.0  | 4.2  |
| Long left_rev donor DNA [pmol] | -    | -   | -    | 3.2  | 5.8  | 3.9  | 5.0  | 4.2  |
| Oligonucleotides (each) [pmol] | 100  | 200 | 250  | 500  | 1000 | 250  | 500  | 1000 |

**Supplementary Table 5: Numbers of Pol III complexes over all analyzed pairs of Miller trees from 5x(O)RDN5, 5x(O)RDN5 with TFIIA overexpression and 2.5x(J)HSX1.**

| Pol III complexes | Trees per strain  |                              |                     |     |
|-------------------|-------------------|------------------------------|---------------------|-----|
|                   | 5x(O) <i>RDN5</i> | 5x(O) <i>RDN5</i> with TFIIA | 2.5x(J) <i>HSX1</i> |     |
| 0                 | 10                | 3                            | 6                   |     |
| 1                 | 0                 | 1                            | 3                   |     |
| 2                 | 4                 | 7                            | 5                   |     |
| 3                 | 6                 | 3                            | 5                   |     |
| 4                 | 7                 | 10                           | 5                   |     |
| 5                 | 3                 | 10                           | 6                   |     |
| 6                 | 2                 | 7                            | 3                   |     |
| 7                 | 1                 | 4                            | 0                   |     |
| 8                 | 1                 | 8                            | 1                   |     |
| 9                 | 1                 | 0                            | 1                   |     |
| 10                | 0                 | 1                            | 0                   |     |
|                   | 35                | 48                           | 41                  | = n |
